# Supplementary material for: Solid Magnetoliposomes as Multi-Stimuli-Responsive Systems for Controlled Release of Doxorubicin: Assessment of Lipid Formulations
Source: MDPI journal article supplement (doi:10.3390/biomedicines10051207), 2022-05-23
Supplement: s1 [file s1]

# Solid magnetoliposomes as multi-stimuli-responsive systems for controlled release of doxorubicin: assessment of lipid formulations

Beatriz D. Cardoso, Vanessa F. Cardoso, Senentxu Lanceros-Méndez and Elisabete M. S. Castanheira

## Supplementary material

### 1. Interaction with Human Serum Albumin

The calculated variables (following Equation 3) for the interaction of DOX-loaded SMLs with Human Serum Albumin (HSA) are summarized in Table S1.

**Table S1.** Dissociation constant ( $k_d$ ), binding constant ( $k_b = \frac{1}{k_d}$ ) and number of binding locations ( $n$ ) of liposomes to HSA.

|   |                          | $k_d$ (M)             | $k_b$ (M <sup>-1</sup> ) | $n$  | $R^2$ |
|---|--------------------------|-----------------------|--------------------------|------|-------|
| A | Free DOX                 | $8.24 \times 10^{-7}$ | $5.26 \times 10^6$       | 1.80 | 0.96  |
|   | DPPC                     | $2.00 \times 10^{-7}$ | $5.00 \times 10^6$       | 1.60 | 0.96  |
|   | DPPC/ CHEMS              | $1.21 \times 10^{-6}$ | $8.25 \times 10^5$       | 1.53 | 0.98  |
|   | DPPC/ CHEMS/DSPE-PEG     | $1.72 \times 10^{-6}$ | $5.81 \times 10^5$       | 1.44 | 0.97  |
| B | DPPC/DSPC                | $9.22 \times 10^{-7}$ | $1.01 \times 10^6$       | 1.67 | 0.99  |
|   | DPPC/DSPC/CHEMS          | $4.27 \times 10^{-7}$ | $2.12 \times 10^6$       | 1.66 | 0.99  |
|   | DPPC/DSPC/CHEMS/DSPE-PEG | $8.16 \times 10^{-7}$ | $1.23 \times 10^6$       | 1.53 | 0.98  |
| C | DPPC/DOPE                | $7.72 \times 10^{-7}$ | $1.30 \times 10^6$       | 1.62 | 0.98  |
|   | DPPC/DOPE/CHEMS          | $2.92 \times 10^{-7}$ | $3.43 \times 10^6$       | 1.48 | 0.98  |
|   | DPPC/DOPE/CHEMS/DSPE-PEG | $9.90 \times 10^{-7}$ | $1.01 \times 10^6$       | 1.46 | 0.98  |

### 2. Drug release kinetics and mathematical modelling of the release profile

The Weibull model is expressed by Equation S.1 in terms of the drug fraction accumulated ( $m$ ) in solution at the time  $t$  [1]:

$$m = 1 - \exp^{-(t-T_i)^{\frac{b}{a}}} \quad (\text{S.1})$$

where  $a$  is a scale parameter that defines the timescale of the process,  $T_i$  represents the latency time of the release process (often being zero), and  $b$  is a parameter that characterizes the type of curve ( $b = 1$  is

exponential;  $b > 1$  is sigmoid, with ascendant curvature delimited by an inflection point; and  $b < 1$  is parabolic, displaying high initial slope and a consistent exponential character).

The first-order kinetic model is described by Equation S.2 [2]:

$$F(\%) = M_0 \times (1 - e^{-kt}) \quad (\text{S.2})$$

where  $F(\%)$  is the percentage of released drug,  $M_0$  represents the total amount of the drug released,  $k$  represents the first-order rate constant and  $t$  the time. Considering that the total drug release varies between experiments,  $M_0$  was considered as a variable.

The Korsmeyer-Peppas model (power law) is a more comprehensive semi-empirical equation that establishes an exponential relationship between release and time, following Equation S.3 [3]:

$$C_t/C_0 = K \cdot t^n \quad (\text{S.3})$$

where  $C_0$  and  $C_t$  are the concentrations at time 0 and  $t$ , respectively,  $K$  is the rate constant and  $n$  is the transport exponent.

The constants values and coefficients of determination obtained for each model are summarized in Table S2 (for DPPC-based SMLs), Table S3 (for DPPC/DSPC-based SMLs) and Table S4 (for DPPC/DOPE-based SMLs).

**Table S2.** Parameters obtained by the fitting of the different mathematical model for the kinetic data and corresponding coefficient of determination ( $R^2$ ), according to the temperature and pH variation for Group A lipid formulations.

| Group A                 |     |       |                             |         |                            |       |             |       |                  |      |       |
|-------------------------|-----|-------|-----------------------------|---------|----------------------------|-------|-------------|-------|------------------|------|-------|
|                         | pH  | T     | $y_{max}(\%) \pm \text{SD}$ | Weibull |                            |       | First-order |       | Korsmeyer-Peppas |      |       |
|                         |     |       |                             | $b$     | $a$                        | $R^2$ | $k$         | $R^2$ | $K$              | $n$  | $R^2$ |
| DPPC                    | 5.5 | 42 °C | 25 ± 2                      | 1.18    | 0.29                       | 0.99  | 0.35        | 0.99  | 10.76            | 0.30 | 0.88  |
|                         |     | 37 °C | 9 ± 1                       | 0.89    | 0.37                       | 0.94  | 0.34        | 0.93  | 3.74             | 0.28 | 0.90  |
|                         | 7.4 | 42 °C | 6.5 ± 0.2                   | 1.59    | 0.71                       | 0.96  | 0.82        | 0.94  | 4.66             | 0.14 | 0.74  |
|                         |     | 37 °C | 4 ± 1                       | 0.83    | 0.34                       | 0.88  | 0.27        | 0.88  | 2.64             | 0.28 | 0.83  |
| DPPC/CHEMS              | 5.5 | 42 °C | 35 ± 5                      | 0.99    | 0.61                       | 0.98  | 0.61        | 0.98  | 23.84            | 0.15 | 0.92  |
|                         |     | 37 °C | 21.1 ± 0.3                  | 0.77    | 0.72                       | 0.91  | 0.65        | 0.91  | 13.90            | 0.15 | 0.89  |
|                         | 7.4 | 42 °C | 23 ± 1                      | 0.75    | 0.28                       | 0.98  | 0.23        | 0.97  | 5.90             | 0.37 | 0.94  |
|                         |     | 37 °C | 18 ± 1                      | 0.92    | 0.32                       | 0.97  | 0.31        | 0.97  | 7.46             | 0.29 | 0.94  |
| DPPC/CHEMS/<br>DSPE-PEG | 5.5 | 42 °C | 25 ± 2                      | 4.60    | 0.01                       | 0.94  | 0.30        | 0.83  | 9.74             | 0.36 | 0.65  |
|                         |     | 37 °C | 16 ± 2                      | 2.44    | 0.07                       | 0.98  | 0.29        | 0.87  | 5.94             | 0.33 | 0.70  |
|                         | 7.4 | 42 °C | 17 ± 2                      | 1.53    | 0.14                       | 0.86  | 0.25        | 0.84  | 4.61             | 0.36 | 0.76  |
|                         |     | 37 °C | 11 ± 5                      | 10.0    | 8.23<br>x 10 <sup>-5</sup> | 0.97  | 0.38        | 0.58  | 5.51             | 0.24 | 0.35  |

**Table S3.** Fitting parameters for each mathematical model for the kinetic data and corresponding coefficient of determination ( $R^2$ ), according to the temperature and pH variation for Group B lipid formulations.

| Group B                          |     |       |                      |         |       |       |             |       |                  |      |       |
|----------------------------------|-----|-------|----------------------|---------|-------|-------|-------------|-------|------------------|------|-------|
|                                  | pH  | T     | $y_{max}(\%) \pm SD$ | Weibull |       |       | First-order |       | Korsmeyer-Peppas |      |       |
|                                  |     |       |                      | $b$     | $a$   | $R^2$ | $k$         | $R^2$ | $K$              | $n$  | $R^2$ |
| DPPC/DSPC                        | 5.5 | 42 °C | 40 ± 3               | 2.11    | 0.08  | 0.98  | 0.30        | 0.91  | 14.50            | 0.31 | 0.70  |
|                                  |     | 37 °C | 24.1 ± 0.9           | 21.97   | 1.99  | 0.98  | 0.90        | 0.74  | 0.50             | 0.30 | 0.42  |
|                                  | 7.4 | 42 °C | 12.8 ± 0.6           | 1.57    | 0.18  | 0.97  | 0.35        | 0.94  | 6.06             | 0.27 | 0.69  |
|                                  |     | 37 °C | 14 ± 2               | 1.66    | 0.35  | 0.98  | 0.85        | 0.60  | 12.11            | 0.19 | 0.47  |
| DPPC/DSPC/<br>CHEMS              | 5.5 | 42 °C | 25 ± 1               | 0.59    | 0.55  | 0.94  | 0.51        | 0.64  | 12.12            | 0.20 | 0.96  |
|                                  |     | 37 °C | 25.7 ± 0.5           | 1.11    | 0.48  | 0.97  | 0.45        | 0.36  | 19.80            | 0.10 | 0.93  |
|                                  | 7.4 | 42 °C | 13 ± 1               | 0.06    | 0.02  | 0.74  | 0.13        | 0.18  | 8.89             | 0.05 | 0.72  |
|                                  |     | 37 °C | 8 ± 1                | 0.38    | 0.37  | 0.98  | 0.18        | 0.73  | 0.24             | 3.5  | 0.97  |
| DPPC/DSPC/<br>CHEMS/DSPE-<br>PEG | 5.5 | 42 °C | 22 ± 3               | 9.872   | 0.001 | 0.97  | 0.19        | 0.44  | 12.83            | 0.19 | 0.44  |
|                                  |     | 37 °C | 21 ± 1               | 4.456   | 0.005 | 0.95  | 0.43        | 0.73  | 5.86             | 0.43 | 0.73  |
|                                  | 7.4 | 42 °C | 11 ± 1               | 1.39    | 0.15  | 0.86  | 0.36        | 0.78  | 3.33             | 0.36 | 0.78  |
|                                  |     | 37 °C | 12 ± 1               | 1.72    | 0.15  | 0.88  | 0.49        | 0.92  | 3.83             | 0.49 | 0.92  |

**Table S4.** Fitting parameters for each mathematical model to the kinetic data and corresponding coefficient of determination ( $R^2$ ), according to the temperature and pH variation for Group C lipid formulations.

| Group C                          |     |       |                      |         |                         |       |             |       |                  |      |       |
|----------------------------------|-----|-------|----------------------|---------|-------------------------|-------|-------------|-------|------------------|------|-------|
|                                  | pH  | T     | $y_{max}(\%) \pm SD$ | Weibull |                         |       | First-order |       | Korsmeyer-Peppas |      |       |
|                                  |     |       |                      | $b$     | $a$                     | $R^2$ | $k$         | $R^2$ | $K$              | $n$  | $R^2$ |
| DPPC/DOPE                        | 5.5 | 42 °C | 21 ± 1               | 6.747   | 0.001                   | 0.98  | 0.31        | 0.76  | 8.79             | 0.29 | 0.55  |
|                                  |     | 37 °C | 16 ± 2               | 7.53    | 6.44 × 10 <sup>-5</sup> | 0.94  | 0.28        | 0.67  | 7.57             | 0.29 | 0.45  |
|                                  | 7.4 | 42 °C | 17 ± 1               | 1.68    | 0.17                    | 0.91  | 0.31        | 0.87  | 6.84             | 0.28 | 0.71  |
|                                  |     | 37 °C | 8 ± 1                | 1.68    | 0.03                    | 0.91  | 0.08        | 0.88  | 1.45             | 0.64 | 0.84  |
| DPPC/DOPE/<br>CHEMS              | 5.5 | 42 °C | 25 ± 2               | 1.91    | 0.32                    | 0.99  | 0.69        | 0.99  | 21.2             | 0.06 | 0.95  |
|                                  |     | 37 °C | 14.6 ± 0.8           | 1.32    | 0.23                    | 0.78  | 0.33        | 0.77  | 8.75             | 0.21 | 0.73  |
|                                  | 7.4 | 42 °C | 15.7 ± 0.3           | 3.30    | 0.03                    | 0.97  | 0.35        | 0.90  | 8.57             | 0.19 | 0.81  |
|                                  |     | 37 °C | 10 ± 2               | 10.47   | 0.001                   | 0.96  | 0.40        | 0.76  | 7.61             | 0.16 | 0.65  |
| DPPC/DOPE/<br>CHEMS/DSPE-<br>PEG | 5.5 | 42 °C | 22 ± 3               | 9.87    | 0.001                   | 0.97  | 0.32        | 0.69  | 12.83            | 0.19 | 0.44  |
|                                  |     | 37 °C | 21 ± 2               | 4.45    | 0.005                   | 0.95  | ----        | ----  | 5.86             | 0.43 | 0.73  |
|                                  | 7.4 | 42 °C | 11 ± 1               | 1.39    | 0.15                    | 0.85  | ----        | ----  | 3.35             | 0.36 | 0.78  |
|                                  |     | 37 °C | 18 ± 1               | 1.54    | 0.07                    | 0.98  | ----        | ----  | 3.83             | 0.49 | 0.92  |

## References

1. Noyes, A.A.; Whitney, W.R. The rate of solution of solid substances in their own solutions. *Journal of the American Chemical Society* **1897**, *19*, 930-934. doi: 10.1021/ja02086a003
2. Papadopoulou, V.; Kosmidis, K.; Vlachou, M.; Macheras, P. On the use of the Weibull function for the discernment of drug release mechanisms. *International Journal of Pharmaceutics* **2006**, *309*, 44-50. doi:10.1016/j.ijpharm.2005.10.044
3. Korsmeyer, R.W.; Gurny, R.; Doelker, E.; Buri, P.; Peppas, N.A. Mechanisms of solute release from porous hydrophilic polymers. *International Journal of Pharmaceutics* **1983**, *15*, 25-35. doi:10.1016/0378-5173(83)90064-9
